# Supplementary material for: Combining structural and coevolution information to unveil allosteric sites
Source: Royal Society of Chemistry journal article supplement (doi:10.1039/d2sc06272k), 2023-01-01
Supplement: d2sc06272k2.xlsx [file d2sc06272k2.xlsx]

## Sheet: Glucocorticoid Receptor
Glucocorticoid Receptor
ResID	Protein Numbering (4UDC)	Resname	Pocket	Rortho (ligand from PDB 4UDC)
1	529	T
2	530	P
3	531	T	P6
4	532	L
5	533	V	P6
6	534	S
7	535	L
8	536	L
9	537	E
10	538	V
11	539	I
12	540	E
13	541	P	P14
14	542	E	P14
15	543	V
16	544	L
17	545	Y
18	546	A
19	547	G
20	548	Y
21	549	D
22	550	S
23	551	S
24	552	V
25	553	P
26	554	D
27	555	S
28	556	T
29	557	W
30	558	R
31	559	I
32	560	M		y
33	561	T		y
34	562	T
35	563	L		y
36	564	N		y
37	565	M		y
38	566	L		y
39	567	G		y
40	568	G		y
41	569	R
42	570	Q		y
43	571	V		y
44	572	I
45	573	A	P14
46	574	A
47	575	V	P13
48	576	K	P14
49	577	W	P14
50	578	A	P13
51	579	K	P13
52	580	A	P14
53	581	I
54	582	P
55	583	G
56	584	F	P13
57	585	R
58	586	N
59	587	L
60	588	H
61	589	L	P13
62	590	D
63	591	D
64	592	Q	P13
65	593	M	P13
66	594	T
67	595	L
68	596	L	P13
69	597	Q	P10
70	598	Y	P10
71	599	S	P10
72	600	W	P10	y
73	601	M	P10	y
74	602	S	P10
75	603	L
76	604	M		y
77	605	A		y
78	606	F
79	607	A
80	608	L		y
81	609	G
82	610	W
83	611	R		y
84	612	S	P9
85	613	Y	P9
86	614	R
87	615	Q
88	616	S	P9
89	617	S	P9
90	618	A	P9
91	619	N	P9
92	620	L
93	621	L
94	622	C		y
95	623	F		y
96	624	A		y
97	625	P
98	626	D
99	627	L
100	628	I
101	629	I
102	630	N
103	631	E
104	632	Q
105	633	R
106	634	M
107	635	T
108	636	L
109	637	P
110	638	D
111	639	M
112	640	Y
113	641	D	P11
114	642	Q	P11	y
115	643	C		y
116	644	K	P11
117	645	H	P11
118	646	M		y
119	647	L	P9
120	648	Y
121	649	V
122	650	S	P9
123	651	S	P9
124	652	E
125	653	L
126	654	H	P9
127	655	R
128	656	L
129	657	Q
130	658	V
131	659	S
132	660	Y
133	661	E	P6
134	662	E
135	663	Y
136	664	L
137	665	C	P6
138	666	M
139	667	K
140	668	T
141	669	L
142	670	L
143	671	L
144	672	L
145	673	S
146	674	S	P10
147	675	V	P8
148	676	P	P8
149	677	K
150	678	D
151	679	G	P8
152	680	L	P8
153	681	K
154	682	S
155	683	Q	P8
156	684	E
157	685	L
158	686	F
159	687	D
160	688	E
161	689	I
162	690	R
163	691	M
164	692	T
165	693	Y
166	694	I	P2
167	695	K	P2
168	696	E	P6
169	697	L
170	698	G	P2
171	699	K	P6
172	700	A	P6
173	701	I	P2
174	702	V	P2
175	703	K	P6
176	704	R
177	705	E
178	706	G
179	707	N
180	708	S
181	709	S
182	710	Q
183	711	N	P2
184	712	W	P2
185	713	Q
186	714	R
187	715	F	P2
188	716	Y	P4
189	717	Q
190	718	L
191	719	T	P4
192	720	K	P4
193	721	L
194	722	L
195	723	D	P4
196	724	S
197	725	M
198	726	H	P4
199	727	E	P4
200	728	V
201	729	V	P10
202	730	E	P10
203	731	N	P11	y
204	732	L	P11	y
205	733	L	P10	y
206	734	N
207	735	Y	P11	y
208	736	C		y
209	737	F	P10	y
210	738	Q
211	739	T		y
212	740	F		y
213	741	L
214	742	D
215	743	K
216	744	T
217	745	M
218	746	S
219	747	I		y
220	748	E
221	749	F		y
222	750	P
223	751	E
224	752	M
225	753	L		y
226	754	A
227	755	E
228	756	I	P10
229	757	I	P10
230	758	T
231	759	N
232	760	Q	P10
233	761	I
234	762	P
235	763	K	P10
236	764	Y	P10
237	765	S
238	766	N
239	767	G
240	768	N
241	769	I	P10
242	770	K
243	771	K	P4
244	772	L	P4/P8
245	773	L	P4
246	774	F	P4
247	775	H	P4
248	776	Q

## Sheet: LFA-1
LFA-1
ResID	Protein Numbering (1T0P)	Resname	Pocket	Rortho (ligand from PDB 1T0P)
1	128	G
2	129	N
3	130	V
4	131	D	P2
5	132	L	P10
6	133	V	P10
7	134	F	P10
8	135	L
9	136	F
10	137	D		y
11	138	G		y
12	139	S		y
13	140	M		y
14	141	S		y
15	142	L		y
16	143	Q		y
17	144	P		y
18	145	D
19	146	E		y
20	147	F
21	148	Q
22	149	K	P10
23	150	I
24	151	L	P15
25	152	D	P10/P15
26	153	F	P10
27	154	M
28	155	K	P15
29	156	D	P10
30	157	V	P10
31	158	M	P8
32	159	K	P8
33	160	K	P10
34	161	L	P10
35	162	S	P8
36	163	N	P8
37	164	T	P8
38	165	S
39	166	Y	P8
40	167	Q	P8
41	168	F	P10
42	169	A
43	170	A
44	171	V
45	172	Q
46	173	F
47	174	S		y
48	175	T		y
49	176	S		y
50	177	Y		y
51	178	K
52	179	T
53	180	E
54	181	F	P7
55	182	D
56	183	F
57	184	S
58	185	D	P7
59	186	Y	P8
60	187	V	P8
61	188	K
62	189	W	P7
63	190	K	P8
64	191	D	P8
65	192	P	P8/P15
66	193	D	P15
67	194	A	P7
68	195	L	P7
69	196	L	P7/P15
70	197	K	P7
71	198	H	P7
72	199	V	P7
73	200	K
74	201	H
75	202	M		y
76	203	L		y
77	204	L		y
78	205	L		y
79	206	T		y
80	207	N		y
81	208	T
82	209	F		y
83	210	G
84	211	A
85	212	I
86	213	N
87	214	Y
88	215	V
89	216	A
90	217	T
91	218	E
92	219	V
93	220	F	P2
94	221	R	P2
95	222	E	P2
96	223	E
97	224	L
98	225	G
99	226	A	P2
100	227	R	P2/P8
101	228	P	P2
102	229	D
103	230	A	P2
104	231	T
105	232	K	P2
106	233	V
107	234	L
108	235	I	P10
109	236	I	P10
110	237	I
111	238	T
112	239	D		y
113	240	G
114	241	E		y
115	242	A		y
116	243	T		y
117	244	D		y
118	245	S		y
119	246	G
120	247	N
121	248	I
122	249	D
123	250	A
124	251	A
125	252	K
126	253	D
127	254	I
128	255	I
129	256	R
130	257	Y	P10
131	258	I	P10
132	259	I	P10
133	260	G
134	261	I
135	262	G	P14
136	263	K	P14	y
137	264	H		y
138	265	F	P14
139	266	Q	P14
140	267	T		y
141	268	K
142	269	E		y
143	270	S
144	271	Q
145	272	E
146	273	T		y
147	274	L
148	275	H
149	276	K
150	277	F
151	278	A
152	279	S
153	280	K
154	281	P
155	282	A
156	283	S
157	284	E	P10
158	285	F	P10
159	286	V	P10
160	287	K	P10
161	288	I	P14
162	289	L	P14
163	290	D	P14
164	291	T
165	292	F
166	293	E	P10
167	294	K
168	295	L	P10
169	296	K	P10
170	297	D
171	298	L	P10
172	299	F	P10
173	300	T
174	301	E	P10
175	302	L	P10
176	303	Q
177	304	K
178	305	K	P10
179	306	I	P10
180	307	Y

## Sheet: P38
P38-a
ResID	Protein Numbering (5ETC)	Resname	Pocket	Rortho (ligand from PDB 3S3I)
1	1	M
2	2	S
3	3	Q	P24
4	4	E
5	5	R	P24
6	6	P	P24
7	7	T
8	8	F	P24
9	9	Y
10	10	R
11	11	Q
12	12	E
13	13	L
14	14	N
15	15	K
16	16	T
17	17	I
18	18	W
19	19	E
20	20	V
21	21	P	P24
22	22	E
23	23	R	P24
24	24	Y	P24
25	25	Q
26	26	N
27	27	L
28	28	S
29	29	P
30	30	V		y
31	31	G
32	32	S
33	33	G
34	34	A
35	35	Y	P19
36	36	G	P19
37	37	S	P19
38	38	V		y
39	39	C
40	40	A
41	41	A
42	42	F
43	43	D
44	44	T
45	45	K
46	46	T
47	47	G
48	48	L
49	49	R
50	50	V
51	51	A		y
52	52	V		y
53	53	K		y
54	54	K
55	55	L	P19
56	56	S	P19
57	57	R	P19
58	58	P	P19
59	59	F
60	60	Q
61	61	S
62	62	I
63	63	I
64	64	H
65	65	A
66	66	K
67	67	R
68	68	T
69	69	Y
70	70	R		y
71	71	E		y
72	72	L
73	73	R
74	74	L		y
75	75	L	P21	y
76	76	K	P21
77	77	H
78	78	M	P21
79	79	K	P21
80	80	H	P21
81	81	E	P16/P21
82	82	N	P16
83	83	V
84	84	I		y
85	85	G	P21
86	86	L	P21
87	87	L
88	88	D	P24
89	89	V	P24
90	90	F	P24
91	91	T	P24
92	92	P	P24
93	93	A
94	94	R	P24
95	95	S
96	96	L
97	97	E
98	98	E
99	99	F
100	100	N
101	101	D
102	102	V
103	103	Y
104	104	L		y
105	105	V		y
106	106	T		y
107	107	H	P21	y
108	108	L		y
109	109	M		y
110	110	G		y
111	111	A		y
112	112	D		y
113	113	L
114	114	N
115	115	N
116	116	I
117	117	V	P2
118	118	K
119	119	C
120	120	Q
121	121	K	P2
122	122	L	P2
123	123	T	P2
124	124	D	P2
125	125	D
126	126	H	P2
127	127	V	P2
128	128	Q
129	129	F
130	130	L
131	131	I
132	132	Y	P16
133	133	Q
134	134	I
135	135	L
136	136	R	P16
137	137	G
138	138	L
139	139	K
140	140	Y
141	141	I
142	142	H
143	143	S
144	144	A
145	145	D
146	146	I
147	147	I
148	148	H	P12
149	149	R	P12
150	150	D	P12
151	151	L	P12
152	152	K	P12
153	153	P
154	154	S		y
155	155	N
156	156	L
157	157	A		y
158	158	V
159	159	N
160	160	E
161	161	D
162	162	C
163	163	E	P16
164	164	L	P16
165	165	K	P16
166	166	I		y
167	167	L		y
168	168	D		y
169	169	F		y
170	170	G		y
171	171	L		y
172	172	A
173	173	R
174	174	H
175	175	T
176	176	D	P10
177	177	D
178	178	E
179	179	M	P10
180	180	T
181	181	G
182	182	Y
183	183	V
184	184	A
185	185	T	P10
186	186	R	P10
187	187	W
188	188	Y	P12
189	189	R	P10/P12
190	190	A	P12
191	191	P	P7
192	192	E	P7
193	193	I	P12
194	194	M	P10
195	195	L	P7
196	196	N
197	197	W	P7
198	198	M	P7
199	199	H
200	200	Y
201	201	N
202	202	Q
203	203	T
204	204	V	P12
205	205	D	P12
206	206	I
207	207	W
208	208	S	P12
209	209	V
210	210	G
211	211	C
212	212	I
213	213	M
214	214	A
215	215	E
216	216	L	P2
217	217	L	P2
218	218	T
219	219	G
220	220	R
221	221	T
222	222	L
223	223	F
224	224	P
225	225	G
226	226	T
227	227	D
228	228	H	P10
229	229	I
230	230	D
231	231	Q
232	232	L	P7
233	233	K
234	234	L
235	235	I
236	236	L	P7
237	237	R
238	238	L	P6
239	239	V	P6
240	240	G	P6
241	241	T	P6
242	242	P	P6/P7
243	243	G	P6
244	244	A
245	245	E
246	246	L	P6/P7
247	247	L
248	248	K
249	249	K	P7
250	250	I	P7
251	251	S
252	252	S
253	253	E
254	254	S
255	255	A
256	256	R
257	257	N
258	258	Y
259	259	I	P7
260	260	Q
261	261	S
262	262	L
263	263	T
264	264	Q
265	265	M
266	266	P
267	267	K	P6
268	268	M
269	269	N
270	270	F	P6
271	271	A
272	272	N
273	273	V
274	274	F	P2
275	275	I
276	276	G
277	277	A	P2
278	278	N	P2
279	279	P
280	280	L
281	281	A	P2
282	282	V
283	283	D
284	284	L
285	285	L
286	286	E	P6
287	287	K
288	288	M
289	289	L	P6
290	290	V	P6
291	291	L	P6/P7
292	292	D	P6/P7
293	293	S	P7
294	294	D
295	295	K	P6
296	296	R	P7
297	297	I
298	298	T
299	299	A
300	300	A
301	301	Q
302	302	A
303	303	L
304	304	A
305	305	H
306	306	A
307	307	Y	P2
308	308	F
309	309	A
310	310	Q
311	311	Y
312	312	H
313	313	D
314	314	P
315	315	D
316	316	D	P16
317	317	E
318	318	P
319	319	V
320	320	A
321	321	D
322	322	P
323	323	Y
324	324	D
325	325	Q
326	326	S
327	327	F
328	328	E
329	329	S
330	330	R
331	331	D
332	332	L
333	333	L
334	334	I
335	335	D
336	336	E
337	337	W
338	338	K
339	339	S
340	340	L
341	341	T
342	342	Y	P24
343	343	D
344	344	E
345	345	V	P24
346	346	I	P24
347	347	S
348	348	F	P21
349	349	V	P21
350	350	P	P21
351	351	P	P21
352	352	P

## Sheet: BCKDK
BCKDK
ResID	Protein Numbering (1GKX)	Resname	Pocket	Rortho (ligand from PDB 4E02)
1	38	V
2	39	R
3	40	L	P19
4	41	T	P19
5	42	P	P19
6	43	T	P26
7	44	M	P19
8	45	M
9	46	L
10	47	Y
11	48	S
12	49	G
13	50	R
14	51	S
15	52	Q
16	53	D
17	54	G
18	55	S
19	56	H
20	57	L
21	58	L
22	59	K
23	60	S
24	61	G
25	62	R
26	63	Y
27	64	L
28	65	Q
29	66	Q
30	67	E
31	68	L	P26
32	69	P
33	70	V	P26
34	71	R	P26
35	72	I	P13
36	73	A
37	74	H	P26
38	75	R	P26/P29
39	76	I
40	77	K
41	78	G	P29
42	79	F	P29
43	80	R
44	81	S	P29
45	82	L	P29
46	83	P
47	84	F
48	85	I
49	86	I
50	87	G
51	88	C
52	89	N
53	90	P
54	91	T
55	92	I
56	93	L
57	94	H
58	95	V	P13
59	96	H
60	97	E
61	98	L	P13
62	99	Y	P13
63	100	I
64	101	R	P13
65	102	A	P13
66	103	F
67	104	Q
68	105	K	P13
69	106	L	P13
70	107	T
71	108	D
72	109	F
73	110	P
74	111	P
75	112	I
76	113	K
77	114	D
78	115	Q
79	116	A
80	117	D
81	118	E
82	119	A
83	120	Q
84	121	Y
85	122	C
86	123	Q
87	124	L	P13
88	125	V	P13
89	126	R
90	127	Q	P13
91	128	L	P13
92	129	L	P13
93	130	D
94	131	D	P13
95	132	H	P13
96	133	K
97	134	D
98	135	V	P13
99	136	V	P13
100	137	T
101	138	L
102	139	L	P13
103	140	A
104	141	E
105	142	G
106	143	L
107	144	R
108	145	E
109	146	S
110	147	R	P25
111	148	K
112	149	H
113	150	I	P25
114	151	E
115	152	D
116	153	E	P25
117	154	K
118	155	L
119	156	V	P25
120	157	R	P25
121	158	Y	P28/P29
122	159	F	P29
123	160	L	P25
124	161	D	P28
125	162	K	P26/P28/P29
126	163	T	P13/P29
127	164	L	P13
128	165	T	P26/P28
129	166	S	P26
130	167	R	P13
131	168	L	P13
132	169	G	P26
133	170	I	P13/P26
134	171	R	P13
135	172	M	P19
136	173	L	P26
137	174	A
138	175	T
139	176	H
140	177	H
141	178	L
142	179	A	P7
143	180	L	P7
144	181	H
145	182	E	P7
146	183	D
147	184	K	P7
148	185	P
149	186	D	P4
150	187	F	P4/P7
151	188	V	P7
152	189	G	P7
153	190	I	P7
154	191	I
155	192	C	P4
156	193	T
157	194	R
158	195	L	P4/P16
159	196	S	P4
160	197	P	P16
161	198	K
162	199	K
163	200	I	P4/P16
164	201	I	P16
165	202	E
166	203	K	P4
167	204	W
168	205	V
169	206	D
170	207	F
171	208	A
172	209	R
173	210	R
174	211	L
175	212	C
176	213	E
177	214	H
178	215	K
179	216	Y
180	217	G
181	218	N
182	219	A
183	220	P
184	221	R
185	222	V
186	223	R
187	224	I
188	225	N
189	226	G
190	227	H
191	228	V
192	229	A
193	230	A
194	231	R
195	232	F	P16
196	233	P
197	234	F	P16/P19
198	235	I	P19
199	236	P	P4/P7
200	237	M	P7/P13
201	238	P	P19
202	239	L	P16/P19
203	240	D
204	241	Y	P10/P13
205	242	I
206	243	L	P16
207	244	P
208	245	E	P10	y
209	246	L		y
210	247	L
211	248	K	P10	y
212	249	N		y
213	250	A		y
214	251	M
215	252	R		y
216	253	A		y
217	254	T
218	255	M
219	256	E
220	257	S
221	258	H
222	259	L
223	260	D
224	261	T
225	262	P
226	263	Y
227	264	N
228	265	V
229	266	P
230	267	D
231	268	V
232	269	V
233	270	I
234	271	T
235	272	I
236	273	A
237	274	N
238	275	N
239	276	D
240	277	V
241	278	D	P19
242	279	L	P16
243	280	I
244	281	I	P16
245	282	R
246	283	I
247	284	S
248	285	D		y
249	286	R
250	287	G		y
251	288	G		y
252	289	G		y
253	290	I		y
254	291	A
255	292	H
256	293	K
257	294	D		y
258	295	L
259	296	D
260	297	R		y
261	298	V		y
262	299	M		y
263	300	D	P25	y
264	301	Y	P25
265	302	H		y
266	303	F		y
267	304	T		y
268	305	T		y
269	306	A		y
270	307	E
271	308	A
272	309	S
273	310	T
274	311	Q
275	312	D
276	313	P
277	314	R
278	315	I
279	316	S
280	317	P
281	318	L
282	319	F
283	320	G
284	321	H
285	322	L
286	323	D
287	324	M
288	325	H
289	326	S
290	327	G
291	328	G
292	329	Q
293	330	S	P10
294	331	G
295	332	P	P10
296	333	M	P10
297	334	H	P10
298	335	G	P10	y
299	336	F	P10	y
300	337	G	P10	y
301	338	F	P10/P13	y
302	339	G	P10	y
303	340	L		y
304	341	P		y
305	342	T	P13
306	343	S
307	344	R
308	345	A	P28
309	346	Y	P13
310	347	A
311	348	E	P28
312	349	Y	P19/P26/P28
313	350	L	P19
314	351	G	P19
315	352	G	P19
316	353	S	P19
317	354	L
318	355	Q
319	356	L		y
320	357	Q
321	358	S
322	359	L
323	360	Q
324	361	G
325	362	I
326	363	G		y
327	364	T		y
328	365	D
329	366	V		y
330	367	Y
331	368	L	P16
332	369	R	P19
333	370	L	P16/P19
334	371	R	P19
335	372	H	P19
336	373	I	P19
337	374	D	P19
338	375	G
339	376	R
340	377	E
341	378	E

## Sheet: MAT2A
MAT2A
ResID	Protein Numbering (6FAJ)	Resname	Monomer	Pocket	Rortho (ligand from PDB 6FBN)
1	16	G	1
2	17	T	1	P21
3	18	F	1	P21
4	19	L	1
5	20	F	1	P21
6	21	T	1
7	22	S	1
8	23	E	1
9	24	S	1
10	25	V	1
11	26	G	1
12	27	E	1	P11
13	28	G	1
14	29	H	1
15	30	P	1	P24
16	31	D	1
17	32	K	1
18	33	I	1	P24
19	34	C	1
20	35	D	1
21	36	Q	1	P11
22	37	I	1
23	38	S	1
24	39	D	1
25	40	A	1	P10
26	41	V	1
27	42	L	1
28	43	D	1	P10/P11
29	44	A	1	P10
30	45	H	1
31	46	L	1
32	47	Q	1	P10
33	48	Q	1
34	49	D	1
35	50	P	1
36	51	D	1	P8
37	52	A	1
38	53	K	1	P8	y
39	54	V	1		y
40	55	A	1		y
41	56	C	1
42	57	E	1	P36	y
43	58	T	1
44	59	V	1	P36
45	60	A	1	P24
46	61	K	1	P24
47	62	T	1
48	63	G	1	P24
49	64	M	1
50	65	I	1	P24
51	66	L	1	P36
52	67	L	1
53	68	A	1	P36
54	69	G	1		y
55	70	E	1		y
56	71	I	1		y
57	72	T	1	P8	y
58	73	S	1	P8
59	74	R	1	P8
60	75	A	1
61	76	A	1
62	77	V	1
63	78	D	1
64	79	Y	1
65	80	Q	1
66	81	K	1	P10
67	82	V	1	P10
68	83	V	1	P24
69	84	R	1	P24
70	85	E	1	P10
71	86	A	1	P10
72	87	V	1	P24
73	88	K	1
74	89	H	1	P10
75	90	I	1	P24
76	91	G	1	P18/P24
77	92	Y	1	P18/P24
78	93	D	1	P18
79	94	D	1	P18
80	95	S	1	P18
81	96	S	1	P18
82	97	K	1	P18
83	98	G	1	P18/P24
84	99	F	1	P18/P24
85	100	D	1	P18/P24
86	101	Y	1	P24
87	102	K	1
88	103	T	1
89	104	C	1	P24
90	105	N	1
91	106	V	1
92	107	L	1
93	108	V	1
94	109	A	1	P36
95	110	L	1
96	111	E	1
97	112	Q	1
98	113	Q	1
99	114	S	1	P8
100	115	P	1	P8
101	116	D	1
102	117	I	1
103	118	A	1
104	119	Q	1
105	120	G	1
106	121	V	1	P8
107	122	H	1	P8
108	123	L	1
109	124	D	1
110	125	R	1
111	126	N	1
112	127	E	1
113	128	E	1
114	129	D	1
115	130	I	1
116	131	G	1
117	132	A	1
118	133	G	1		y
119	134	D	1		y
120	135	Q	1		y
121	136	G	1		y
122	137	L	1	P33	y
123	138	M	1		y
124	139	F	1	P21/P33
125	140	G	1
126	141	Y	1	P22
127	142	A	1
128	143	T	1	P22
129	144	D	1	P22
130	145	E	1	P22
131	146	T	1	P19
132	147	E	1	P19
133	148	E	1	P16
134	149	C	1
135	150	M	1	P16
136	151	P	1	P22
137	152	L	1	P19
138	153	T	1
139	154	I	1	P16
140	155	V	1	P16
141	156	L	1	P19
142	157	A	1
143	158	H	1	P16
144	159	K	1	P16/P19
145	160	L	1
146	161	N	1	P30
147	162	A	1	P11/P16
148	163	K	1
149	164	L	1	P30
150	165	A	1	P30
151	166	E	1	P11
152	167	L	1
153	168	R	1	P18/P30
154	169	R	1	P11/P18
155	170	N	1
156	171	G	1
157	172	T	1
158	173	L	1
159	174	P	1	P18
160	175	W	1	P18
161	176	L	1	P18/P30
162	177	R	1	P18
163	178	P	1	P18
164	179	D	1
165	180	S	1	P30
166	181	K	1	P44
167	182	T	1	P44
168	183	Q	1	P44
169	184	V	1
170	185	T	1
171	186	V	1
172	187	Q	1
173	188	Y	1
174	189	M	1
175	190	Q	1	P21
176	191	D	1
177	192	R	1
178	193	G	1	P22/P21
179	194	A	1	P22
180	195	V	1	P22
181	196	L	1	P22
182	197	P	1	P22
183	198	I	1
184	199	R	1
185	200	V	1
186	201	H	1
187	202	T	1
188	203	I	1
189	204	V	1	P44
190	205	I	1	P44
191	206	S	1	P44
192	207	V	1	P30
193	208	Q	1	P18
194	209	H	1
195	210	D	1
196	211	E	1
197	212	E	1
198	213	V	1
199	214	C	1
200	215	L	1
201	216	D	1
202	217	E	1
203	218	M	1
204	219	R	1
205	220	D	1
206	221	A	1
207	222	L	1
208	223	K	1
209	224	E	1
210	225	K	1
211	226	V	1
212	227	I	1
213	228	K	1
214	229	A	1
215	230	V	1
216	231	V	1
217	232	P	1
218	233	A	1
219	234	K	1
220	235	Y	1	P19
221	236	L	1
222	237	D	1
223	238	E	1
224	239	D	1
225	240	T	1
226	241	I	1
227	242	Y	1
228	243	H	1
229	244	L	1
230	245	Q	1
231	246	P	1	P44
232	247	S	1	P44
233	248	G	1
234	249	R	1
235	250	F	1
236	251	V	1	P18
237	252	I	1	P18
238	253	G	1	P24
239	254	G	1	P24
240	255	P	1	P24
241	256	Q	1	P24
242	257	G	1
243	258	D	1	P24
244	259	A	1
245	260	G	1
246	261	L	1
247	262	T	1
248	263	G	1		y
249	264	R	1
250	265	K	1
251	266	I	1	P21	y
252	267	I	1	P21
253	268	V	1	P16
254	269	D	1	P16
255	270	T	1	P16/P21
256	271	Y	1	P21
257	272	G	1	P21
258	273	G	1	P21
259	274	W	1	P22/P21
260	275	G	1	P21
261	276	A	1	P21
262	277	H	1	P21/P33
263	278	G	1	P33	y
264	279	G	1	P33	y
265	280	G	1		y
266	281	A	1		y
267	282	F	1
268	283	S	1
269	284	G	1
270	285	K	1		y
271	286	D	1
272	287	Y	1
273	288	T	1
274	289	K	1		y
275	290	V	1
276	291	D	1		y
277	292	R	1
278	293	S	1
279	294	A	1	P14
280	295	A	1
281	296	Y	1
282	297	A	1	P5/P14
283	298	A	1	P14
284	299	R	1
285	300	W	1	P5
286	301	V	1	P14
287	302	A	1
288	303	K	1
289	304	S	1	P4
290	305	L	1
291	306	V	1
292	307	K	1	P4
293	308	G	1	P4
294	309	G	1
295	310	L	1
296	311	C	1
297	312	R	1	P22
298	313	R	1	P22/P21
299	314	V	1
300	315	L	1	P21
301	316	V	1	P14/P21
302	317	Q	1	P21/P33
303	318	V	1	P14
304	319	S	1
305	320	Y	1	P14
306	321	A	1
307	322	I	1		y
308	323	G	1
309	324	V	1
310	325	S	1
311	326	H	1	P7/P15
312	327	P	1	P7/P15
313	328	L	1	P15
314	329	S	1	P15
315	330	I	1	P7/P14/P15/P21
316	331	S	1	P21
317	332	I	1	P21
318	333	F	1	P21
319	334	H	1	P21
320	335	Y	1	P21
321	336	G	1
322	337	T	1
323	338	S	1
324	339	Q	1
325	340	K	1
326	341	S	1
327	342	E	1	P21
328	343	R	1	P21
329	344	E	1
330	345	L	1
331	346	L	1	P21
332	347	E	1
333	348	I	1
334	349	V	1	P7/P14
335	350	K	1	P7
336	351	K	1
337	352	N	1
338	353	F	1	P5/P7
339	354	D	1	P5/P7
340	355	L	1	P5/P7/P14
341	356	R	1	P7
342	357	P	1
343	358	G	1
344	359	V	1	P5
345	360	I	1	P5/P14
346	361	V	1
347	362	R	1
348	363	D	1	P5
349	364	L	1	P5
350	365	D	1
351	366	L	1
352	367	K	1
353	368	K	1
354	369	P	1
355	370	I	1	P11
356	371	Y	1
357	372	Q	1	P11
358	373	R	1	P11
359	374	T	1
360	375	A	1	P11
361	376	A	1	P11
362	377	Y	1	P11/P16/P30
363	378	G	1	P16
364	379	H	1	P16
365	380	F	1	P16
366	381	G	1	P16
367	382	R	1	P11/P16
368	383	D	1
369	384	S	1
370	385	F	1
371	386	P	1
372	387	W	1
373	388	E	1
374	389	V	1
375	390	P	1	P4
376	391	K	1	P4
377	392	K	1	P4
378	393	L	1	P4
379	394	K	1
380	395	Y	1
381	1	G	2
382	2	T	2	P21
383	3	F	2	P21
384	4	L	2	P15/P21
385	5	F	2	P21
386	6	T	2	P33
387	7	S	2	P33
388	8	E	2	P33/P43	y
389	9	S	2	P43
390	10	V	2	P43	y
391	11	G	2	P43/P45
392	12	E	2	P43/P45/P55
393	13	G	2
394	14	H	2		y
395	15	P	2	P40	y
396	16	D	2		y
397	17	K	2	P43
398	18	I	2	P40
399	19	C	2
400	20	D	2	P43
401	21	Q	2	P55
402	22	I	2
403	23	S	2
404	24	D	2
405	25	A	2	P55/P61
406	26	V	2
407	27	L	2	P63
408	28	D	2	P61
409	29	A	2	P61
410	30	H	2
411	31	L	2	P63
412	32	Q	2	P61
413	33	Q	2
414	34	D	2	P71
415	35	P	2
416	36	D	2	P71
417	37	A	2
418	38	K	2	P71
419	39	V	2	P59
420	40	A	2	P59
421	41	C	2
422	42	E	2
423	43	T	2
424	44	V	2	P36
425	45	A	2	P36/P40
426	46	K	2	P36/P40	y
427	47	T	2
428	48	G	2
429	49	M	2	P36/P40
430	50	I	2	P40
431	51	L	2	P36
432	52	L	2
433	53	A	2
434	54	G	2
435	55	E	2	P59
436	56	I	2	P59
437	57	T	2	P59/P71
438	58	S	2	P71
439	59	R	2	P71
440	60	A	2
441	61	A	2
442	62	V	2	P61
443	63	D	2	P61
444	64	Y	2
445	65	Q	2
446	66	K	2	P61
447	67	V	2	P61
448	68	V	2
449	69	R	2
450	70	E	2	P61
451	71	A	2	P55/P61
452	72	V	2	P40
453	73	K	2
454	74	H	2	P55/P61
455	75	I	2	P40/P55
456	76	G	2	P42
457	77	Y	2	P40/P42
458	78	D	2	P42
459	79	D	2	P42
460	80	S	2
461	81	S	2
462	82	K	2	P42
463	83	G	2	P42
464	84	F	2	P40/P42
465	85	D	2
466	86	Y	2
467	87	K	2
468	88	T	2
469	89	C	2
470	90	N	2
471	91	V	2
472	92	L	2
473	93	V	2
474	94	A	2
475	95	L	2
476	96	E	2
477	97	Q	2
478	98	Q	2	P71
479	99	S	2	P71
480	100	P	2	P71
481	101	D	2	P71
482	102	I	2
483	103	A	2
484	104	Q	2
485	105	G	2
486	106	V	2
487	107	H	2
488	108	L	2
489	109	D	2	P71
490	110	R	2	P76
491	111	N	2
492	112	E	2	P71
493	113	E	2
494	114	D	2
495	115	I	2
496	116	G	2
497	117	A	2
498	118	G	2
499	119	D	2
500	120	Q	2
501	121	G	2
502	122	L	2	P21
503	123	M	2
504	124	F	2	P21
505	125	G	2
506	126	Y	2	P21
507	127	A	2
508	128	T	2
509	129	D	2
510	130	E	2
511	131	T	2
512	132	E	2
513	133	E	2	P47
514	134	C	2
515	135	M	2	P47
516	136	P	2	P47
517	137	L	2
518	138	T	2
519	139	I	2	P33/P43/P47
520	140	V	2	P47
521	141	L	2
522	142	A	2
523	143	H	2	P43/P47
524	144	K	2	P47
525	145	L	2
526	146	N	2	P45
527	147	A	2	P47/P55
528	148	K	2
529	149	L	2	P45
530	150	A	2	P45/P55
531	151	E	2	P55
532	152	L	2
533	153	R	2	P42/P45
534	154	R	2	P42/P55
535	155	N	2
536	156	G	2
537	157	T	2
538	158	L	2
539	159	P	2
540	160	W	2
541	161	L	2	P42/P45
542	162	R	2	P42/P45
543	163	P	2	P42/P45
544	164	D	2	P45	y
545	165	S	2	P45	y
546	166	K	2		y
547	167	T	2
548	168	Q	2
549	169	V	2
550	170	T	2
551	171	V	2
552	172	Q	2	P21
553	173	Y	2
554	174	M	2
555	175	Q	2	P21
556	176	D	2
557	177	R	2
558	178	G	2	P21
559	179	A	2
560	180	V	2	P21
561	181	L	2
562	182	P	2
563	183	I	2
564	184	R	2
565	185	V	2
566	186	H	2
567	187	T	2
568	188	I	2
569	189	V	2
570	190	I	2
571	191	S	2		y
572	192	V	2	P45
573	193	Q	2	P42
574	194	H	2
575	195	D	2
576	196	E	2
577	197	E	2
578	198	V	2
579	199	C	2
580	200	L	2
581	201	D	2
582	202	E	2
583	203	M	2
584	204	R	2
585	205	D	2
586	206	A	2
587	207	L	2
588	208	K	2
589	209	E	2
590	210	K	2
591	211	V	2
592	212	I	2
593	213	K	2
594	214	A	2
595	215	V	2
596	216	V	2
597	217	P	2
598	218	A	2
599	219	K	2
600	220	Y	2
601	221	L	2
602	222	D	2
603	223	E	2
604	224	D	2
605	225	T	2
606	226	I	2
607	227	Y	2
608	228	H	2
609	229	L	2
610	230	Q	2
611	231	P	2		y
612	232	S	2		y
613	233	G	2
614	234	R	2		y
615	235	F	2		y
616	236	V	2		y
617	237	I	2		y
618	238	G	2	P42	y
619	239	G	2	P40	y
620	240	P	2	P40
621	241	Q	2
622	242	G	2		y
623	243	D	2	P40	y
624	244	A	2	P36/P40	y
625	245	G	2	P40	y
626	246	L	2	P36	y
627	247	T	2
628	248	G	2	P43
629	249	R	2	P43	y
630	250	K	2	P43	y
631	251	I	2	P43
632	252	I	2	P21/P33
633	253	V	2	P33/P43/P47	y
634	254	D	2	P43/P47
635	255	T	2	P21/P47
636	256	Y	2	P21/P33/P47
637	257	G	2	P33
638	258	G	2	P21/P33
639	259	W	2	P21
640	260	G	2	P21
641	261	A	2	P21
642	262	H	2	P21
643	263	G	2
644	264	G	2
645	265	G	2
646	266	A	2	P43
647	267	F	2	P43
648	268	S	2	P43
649	269	G	2
650	270	K	2	P63
651	271	D	2	P63
652	272	Y	2	P63
653	273	T	2
654	274	K	2	P59
655	275	V	2
656	276	D	2
657	277	R	2	P63
658	278	S	2	P63
659	279	A	2	P60
660	280	A	2
661	281	Y	2
662	282	A	2	P60/P67
663	283	A	2	P60
664	284	R	2
665	285	W	2	P67
666	286	V	2	P60/P67
667	287	A	2
668	288	K	2
669	289	S	2	P75
670	290	L	2
671	291	V	2
672	292	K	2	P75
673	293	G	2	P75
674	294	G	2
675	295	L	2
676	296	C	2
677	297	R	2
678	298	R	2	P21
679	299	V	2
680	300	L	2	P21
681	301	V	2	P21/P60
682	302	Q	2	P21
683	303	V	2	P60
684	304	S	2
685	305	Y	2
686	306	A	2
687	307	I	2	P44
688	308	G	2
689	309	V	2
690	310	S	2
691	311	H	2	P58
692	312	P	2	P58
693	313	L	2
694	314	S	2	P58
695	315	I	2	P21/P58/P60
696	316	S	2	P21
697	317	I	2	P21/P60
698	318	F	2	P21
699	319	H	2	P21
700	320	Y	2	P21
701	321	G	2	P21
702	322	T	2
703	323	S	2
704	324	Q	2
705	325	K	2
706	326	S	2
707	327	E	2	P21
708	328	R	2	P21
709	329	E	2
710	330	L	2
711	331	L	2	P21
712	332	E	2
713	333	I	2
714	334	V	2	P58/P60
715	335	K	2	P58
716	336	K	2
717	337	N	2
718	338	F	2	P58/67
719	339	D	2	P58/P67
720	340	L	2	P58/P60/P67
721	341	R	2	P58
722	342	P	2
723	343	G	2
724	344	V	2	P67
725	345	I	2	P60/P67
726	346	V	2	P76
727	347	R	2	P76
728	348	D	2	P67
729	349	L	2	P67
730	350	D	2	P76
731	351	L	2	P63/P76
732	352	K	2	P76
733	353	K	2	P76
734	354	P	2
735	355	I	2
736	356	Y	2	P63
737	357	Q	2	P55
738	358	R	2	P55
739	359	T	2	P43
740	360	A	2	P43
741	361	A	2	P43/P55
742	362	Y	2	P43/P47/P55
743	363	G	2	P43/P47
744	364	H	2	P43
745	365	F	2	P47
746	366	G	2	P47
747	367	R	2	P55
748	368	D	2
749	369	S	2
750	370	F	2
751	371	P	2
752	372	W	2
753	373	E	2
754	374	V	2
755	375	P	2	P75
756	376	K	2	P67/P75
757	377	K	2	P75
758	378	L	2	P75
759	379	K	2
760	380	Y	2	P75
